# Supplementary material for: A novel quantitative trait locus implicates Msh3 in the propensity for genome-wide short tandem repeat expansions in mice
Source: Genome Res. 2023 May;33(5):689–702. doi: 10.1101/gr.277576.122 (PMC10317118; doi:10.1101/gr.277576.122)
Supplement: Supplemental Material [file supp_gr.277576.122_Supplemental_Tables.xlsx]

## Sheet: Supp_Tbl_1
Supplementary Table 1: Variant effect annotations for genes within the confidence interval spanned by the expansion propensity QTL
The number of variants with a predicted consequence (columns) for protein coding genes (rows) in the QTL confidence interval for expansion propensity based on tetranucleotide loci. Consequences are grouped by impact score (high, moderate, low, modifier) from Variant Effect Predictor. Each variant is counted once per gene by first selecting the most severe consequence of the variant/transcript wit…
		HIGH		MODERATE			LOW		MODIFIER
		frameshift_variant	stop_lost	inframe_insertion	inframe_deletion	missense_variant	splice_region_variant	synonymous_variant	coding_sequence_variant	5_prime_UTR_variant	3_prime_UTR_variant	non_coding_transcript_exon_variant	intron_variant	upstream_gene_variant	downstream_gene_variant	# high impact variants	# non-modifier impact variants	Gene description	Gene Length (bp)	Transcript (canonical) length (bp)	High impact variants/ trancript bp (*10^4)	Moderate impact variants/ trancript bp (*10^4)	Low impact variants/ trancript bp (*10^4)	Total impact variants/ transcript bp (*10^4)
1	Cmya5	2		3	1	33		25					544	13		2	64	cardiomyopathy associated 5	104012	11850	1.68776	31.2236	21.097	54.0084
2	Msh3				1	4	3	3			17	12	171		2		11	mutS homolog 3	143132	3946	0	12.6711	15.2053	27.8763
3	Vcan					7		1			5		31	4	23		8	versican	87198	12427	0	5.6329	0.804699	6.4376
4	Xrcc4					3	1	1		2	1		952	15	1		5	X-ray repair complementing defective repair in Chinese hamster cells 4	315582	1540	0	19.4805	12.987	32.4675
5	Atp6ap1l					1		4					145	29	26		5	ATPase, H+ transporting, lysosomal accessory protein 1-like	21923	1186	0	8.4317	33.7268	42.1585
6	Atg10	1				2		1			6		834	1	14	1	4	autophagy related 10	288613	1583	6.31712	12.6342	6.31712	25.2685
7	Tent2					1		2		3	3		167	24	16		3	terminal nucleotidyltransferase 2	46104	2990	0	3.34448	6.68896	10.0334
8	Rps23						2			3	5	9	24	36	79		2	ribosomal protein S23	1993	937	0	0	21.3447	21.3447
9	Thbs4							2					76	1	16		2	thrombospondin 4	43229	3198	0	0	6.25391	6.25391
10	Zcchc9		1								1			2	3	1	1	zinc finger, CCHC domain containing 9	11173	1541	6.48929	0	0	6.48929
11	Acot12							1					212	16	3		1	acyl-CoA thioesterase 12	44637	3058	0	0	3.27011	3.27011
12	Ssbp2								1		18	15	926	1	50			single-stranded DNA binding protein 2	243147	3957	0	0	0	0
13	Rasgrf2										5		135	5	2			RAS protein-specific guanine nucleotide-releasing factor 2	239646	7764	0	0	0	0
14	Hapln1									3	1		117	15	4			hyaluronan and proteoglycan link protein 1	71857	5715	0	0	0	0
15	Homer1									5	3		83	8	5			homer scaffolding protein 1	105495	4287	0	0	0	0
16	Dhfr										2		7	70				dihydrofolate reductase	34328	5347	0	0	0	0
17	Tmem167									5	6		29	18	1			transmembrane protein 167	54785	8689	0	0	0	0
18	Serinc5												14		11			serine incorporator 5	100857	5366	0	0	0	0
19	Ckmt2												5	2	1			creatine kinase, mitochondrial 2	23499	1486	0	0	0	0
20	Zfyve16												3	3				zinc finger, FYVE domain containing 16	43761	6150	0	0	0	0
21	Gm20379														5			predicted gene, 20379	1204	1204	0	0	0	0
22	Spz1													2	3			spermatogenic leucine zipper 1	1537	1537	0	0	0	0
23	Mtx3											1		2	1			metaxin 3	13471	6275	0	0	0	0
24	Ankrd34b												1	1				ankyrin repeat domain 34B	15763	4013	0	0	0	0
25	Fam151b												2					family with sequence similarity 151, member B	34391	1152	0	0	0	0

## Sheet: Supp_Tbl_2
Supplementary Table 2: Variants with HIGH, MODERATE or LOW impact within DNA repair genes
Ssbp2 contained only variants with predicted modifier impact which are not shown. Non-modifier variants found in Xrcc4, Atg10 and Msh3 are shown. The canonical protein coding transcripts Xrcc4-201 and Atg10-201 were chosen as representative of Xrcc4 and Atg10 respectively. Msh3-202 is the canonical full length protein coding transcript of Msh3, while Msh-209 is a nonsense mediated decay transcrip…
SYMBOL	Locus type	Locus	Top consequence	IMPACT	Feature	BIOTYPE	Existing_variation	Amino_acids	SIFT
Xrcc4	snp	chr13_90001025_90001025	missense_variant	MODERATE	Xrcc4-201	protein_coding	rs13461242	D/E	tolerated
		chr13_90062046_90062046					rs13461241	R/Q	tolerated tolerated_low_confidence
		chr13_90071601_90071601					rs49037766	T/A	tolerated
		chr13_90071534_90071534	splice_region_variant	LOW			rs51454619	-
		chr13_90071653_90071653	synonymous_variant				rs50305310	Y
Atg10		chr13_91154245_91154245	frameshift_variant	HIGH	Atg10-201		-	A/VSTLAGVPTCGNTCX
			inframe_insertion	MODERATE			rs230013535	A/VGTPA
		chr13_91154257_91154257	missense_variant				rs30292539	L/S	tolerated tolerated_low_confidence
		chr13_91154261_91154261					rs247872711	T/A
		chr13_91022608_91022608	synonymous_variant	LOW			rs29511431	R
Msh3		chr13_92344961_92344961	missense_variant	MODERATE	Msh3-202		rs49418360	I/V	tolerated
		chr13_92345041_92345041					rs49524640	T/I
		chr13_92351271_92351271					rs48140189	A/V	tolerated_low_confidence deleterious deleterious_low_confidence
		chr13_92353237_92353237					rs29237028	A/S	tolerated_low_confidence tolerated
		chr13_92353222_92353222	splice_region_variant	LOW			rs51768241	-
		chr13_92349155_92349155	synonymous_variant				rs233396231	D
		chr13_92349194_92349194					rs255836106	C
		chr13_92349232_92349232					rs50848869	L
	sv	chr13_92348038_92348424_DEL	inframe_deletion	MODERATE	Msh3-209	nonsense_mediated_decay	-	-
	snp	chr13_92348451_92348451	splice_region_variant	LOW			rs49933543
		chr13_92348452_92348452					rs48930870

## Sheet: Supp_Tbl_3
Supplementary Table 3: Variants with HIGH, MODERATE or LOW impact within non DNA repair genes
Only variants with predicted HIGH, MODERATE or LOW impact by VEP are shown. Genes with only modifier variants and are not shown. The canonical protein coding transcript was chosen as the representative one for each gene. Existing rsxxxxx variant codes are given where available. Resulting amino-acids substitutions are shown for missense and indel variants along with SIFT scores.
SYMBOL	Locus type	Locus	Top consequence	IMPACT	Feature	BIOTYPE	Existing_variation	Amino_acids	SIFT
Acot12	snp	chr13_91741554_91741554	synonymous_variant	LOW	ENSMUST00000022120	protein_coding	rs29550864	G
Atp6ap1l		chr13_90898706_90898706			ENSMUST00000183162		rs29574124	D
		chr13_90898724_90898724					rs29496701	T
		chr13_90898769_90898769					rs29912862	I
Cmya5		chr13_93090398_93090398	frameshift_variant	HIGH	ENSMUST00000062122		-	Y/YMVX
		chr13_93093273_93093273						T/IWLFQHPDVVX	tolerated_low_confidence
		chr13_93095484_93095484	inframe_deletion	MODERATE			rs236107424	PL/L
		chr13_93095363_93095363	inframe_insertion				-	P/PAPALSSLVPESDRVRMRIL
		chr13_93096594_93096594					rs241709091	L/QL
		chr13_93096787_93096787					-	E/KGHALEPIVHREEEHAPEPIVHRDE	tolerated_low_confidence
		chr13_93050247_93050247	missense_variant				rs230264465	L/H	tolerated
		chr13_93063579_93063579					rs46190260	A/P
		chr13_93089610_93089610					rs45988495	E/V
		chr13_93089983_93089983					rs47027593	T/S
		chr13_93090133_93090133					rs46721891	G/C	deleterious
		chr13_93090676_93090676					rs29683553	E/K	tolerated
		chr13_93091063_93091063					rs29782879	T/A	tolerated_low_confidence
		chr13_93091171_93091171					rs30042156	Y/D
		chr13_93091237_93091237					rs29228197	T/A
		chr13_93091338_93091338					rs29225059	V/A
		chr13_93091411_93091411					rs29664389	S/P
		chr13_93092335_93092335					rs29230896
		chr13_93093154_93093154					rs29545639	P/S
		chr13_93093273_93093273					rs29587522	T/I
		chr13_93093829_93093829					rs29531945	L/F
		chr13_93093865_93093865					rs29909458	V/L
		chr13_93094030_93094030					rs29512265	T/A
		chr13_93094078_93094078					rs29241742	V/I
		chr13_93094221_93094221					rs30093536	M/T
		chr13_93094230_93094230					rs29588873
		chr13_93094254_93094254					rs29590287	A/V
		chr13_93094911_93094911					rs46649207	E/A
		chr13_93094917_93094917					rs51342473	Q/R
		chr13_93095007_93095007					rs47084672	L/P
		chr13_93095088_93095088					rs37447855	P/L
		chr13_93095160_93095160					rs51498855	R/T
		chr13_93095279_93095279					rs51602941	D/E
		chr13_93096066_93096066					rs29723715	S/N
		chr13_93096555_93096555					rs51771454	T/I
		chr13_93096741_93096741					rs107885122	V/A
		chr13_93096787_93096787					rs265481359	E/K
		chr13_93097446_93097446					rs29234964	I/T
		chr13_93097597_93097597					rs29637473	N/Y	deleterious_low_confidence
		chr13_93097666_93097666					rs29529749	A/T	tolerated_low_confidence
		chr13_93097721_93097721					rs29225768	L/F
		chr13_93065229_93065229	synonymous_variant	LOW			rs49101022	R
		chr13_93089890_93089890					rs45792671
		chr13_93090383_93090383					rs247211335	D
		chr13_93090398_93090398					rs45752951	Y
		chr13_93090677_93090677					rs29553211	N
		chr13_93090731_93090731					rs29247294	T
		chr13_93090749_93090749					rs29249681	A
		chr13_93091166_93091166					rs29529089	T
		chr13_93092639_93092639					rs29821259	A
		chr13_93094253_93094253					rs29821453
		chr13_93094271_93094271					rs29676606
		chr13_93094886_93094886					rs50544730	P
		chr13_93094940_93094940					rs50196758	V
		chr13_93095183_93095183					rs46922239
		chr13_93095363_93095363					rs46121389	P
		chr13_93095861_93095861					rs46498970	D
		chr13_93096161_93096161					rs30007293	S
		chr13_93096344_93096344					rs29552428	T
		chr13_93096365_93096365					rs29511597	E
		chr13_93096395_93096395					rs29890650
		chr13_93096500_93096500					rs29513282	P
		chr13_93096560_93096560					rs47958753	T
		chr13_93096590_93096590					rs108903181	E
		chr13_93097343_93097343					rs29819815	A
		chr13_93097766_93097766					rs36807315	P
		chr13_93098150_93098150					rs29756746
		chr13_93098285_93098285					rs30055369	S
Rasa1		chr13_85216185_85216185	splice_region_variant		ENSMUST00000109552		rs29858558	H
		chr13_85217017_85217017					rs253614197	-
		chr13_85223548_85223548					rs29707502
		chr13_85234352_85234352					rs29640476
		chr13_85233609_85233609	synonymous_variant				rs29908983	V
		chr13_85256405_85256405					rs13461642	G
Rps23		chr13_90923753_90923753	splice_region_variant		ENSMUST00000051955		rs30296939	-
		chr13_90924454_90924454					rs51235018
Tent2		chr13_93155056_93155056	synonymous_variant		ENSMUST00000225868		rs29536429	S
		chr13_93185870_93185870					rs29589114	P
Thbs4		chr13_92751769_92751769			ENSMUST00000022213		rs29237217	F
		chr13_92761504_92761504					rs50591667	D
Zcchc9		chr13_91797137_91797137	stop_lost	HIGH	ENSMUST00000022121		rs50065231	*/L

## Sheet: Supp_Tbl_4
Supplementary Table 4: Structural variants within genes associated with DNA repair
Size, predicted impact, consequence and expansion propensity association statistics are summarized for insertions (INS) and deletions (DEL) greater than 50bp in length as identified by pangenome analysis. INS/DEL coordinates are given in the “locus” column. In some cases, multiple overlapping SVs were grouped together. SV size and LOD are reported as median (+/- st.dev) across a set of loci for g…
gene_name	sv_type	variant	locus	sv_size_bp	n_strains	LOD	top_csq	IMPACT
Atg10	DEL	1	chr13:91145765-91145979	215	68	8.71	intron_variant	MODIFIER
	INS	2	chr13:90952654-90953423	770	62	7.78	intron_variant	MODIFIER
Msh3	DEL	1	chr13:92348038-92348424	387	66	8.43	inframe_deletion	MODERATE
	INS	2	chr13:92331859-92334281, chr13:92331859-92334282, chr13:92331859-92334283, chr13:92331938-92332454	2424.00 (+/-852.84)	128	4.22 (+/-3.01)	intron_variant	MODIFIER
	INS	3	chr13:92293411-92293532, chr13:92293411-92293534	123.00 (+/-1.41)	65	4.11 (+/-5.77)	intron_variant	MODIFIER
Ssbp2	DEL	1	chr13:91527596-91527713	118	68	8.59	intron_variant	MODIFIER
	DEL	2	chr13:91678593-91678648, chr13:91678597-91679901	680.50 (+/-883.18)	132	8.31	intron_variant	MODIFIER
	INS	3	chr13:91700623-91700685	63	66	8.31	coding_sequence_variant	MODIFIER
	INS	4	chr13:91519784-91519984, chr13:91519784-91519985	201.50 (+/-0.71)	63	4.11 (+/-3.76)	intron_variant	MODIFIER
Xrcc4	INS	1	chr13:90055029-90055146	118	69	7.32	intron_variant	MODIFIER
	INS	2	chr13:90065662-90065988	327		7.32	intron_variant	MODIFIER
	INS	3	chr13:90059006-90059248	243	67	6.71	intron_variant	MODIFIER

## Sheet: Supp_tbl_5
Supplementary Table 5: Gene expression datasets used in this study
One representative dataset was chosen per study from GeneNetwork representing 30 tissues.
ID	Tissue	Study name	Selected dataset	Dataset note	release year	platform
1	adipose	EPFL_LISP_BXD_Brown_Adipose	GN470	select exon version	2013	Affymetrix Mouse Gene 2.0 ST
2	adrenal	INIA_Adrenal	GN334	select exon version	2012	Affymetrix Mouse Gene 1.0 ST
3	amygdala	INIA_Amygdala	GN158	select exon version	2010	Affymetrix Mouse Gene 1.0 ST
4	blood cells	UMCG_Progenitor_Cells	GN151	select original over transformed version	2009	Illumina mouse-6 v1.1
5		UMCG_Erythroid_Cells	GN150	select original over transformed version	2009	Illumina mouse-6 v1.1
6		UMCG_Myeloid_Cells	GN148	select original over transformed version	2009	Illumina mouse-6 v1.1
7	bone	UCLA_GSE27483_BXD_Bone_Femur	GN414	select version with only BXD strains	2013	Illumina mouse-6 v1.1
8		UTHSC_WGU88_Female_Bone_Femur	GN466	single dataset per study	2013	Affymetrix Mouse Gene 2.0 ST
9	brain	INIA_Brain	GN59	select latest RMA processing	2006	Affymetrix M430 2.0
10		UTSCH_Mouse_BXD_Whole_Brain	GN394	select exon version	2012	ABI Solid Exon
11		UCHSC_BXD_Whole_Brain	GN123	single dataset per study	2006	Affymetrix M430 2.0
12		INIA_Brain	GN101	select PDNN processing	2006	Affymetrix M430 2.0
13		UTHSC_Brain	GN95	select latest PDNN processing	2005	Affymetrix Mouse U74v2
14	cartilage	UCLA_BXD_and_BXH_Cartilage	GN178	select v1 with only BXD strains	2011	Illumina mouse-6 v1.1
15	cerebellum	GE_NIAAA_Cerebellum	GN73	select PDNN processing	2005	Affymetrix M430 2.0
16		SJUT_Cerebellum	GN55	select latest PDNN processing	2005	Affymetrix M430 2.0
17	eye	Eye_M430v2	GN207	select final recomended dataset w/ most strains	2008	Affymetrix M430 2.0
18		Howell_et_al_DBA_Glaucoma	GN400	select latest processing	2011	Affymetrix M430 2.0
19	gastrointestinal	UTHSC_Mouse_BXD_Gastrointestinal	GN597	select exon version	2014	Affymetrix Mouse Gene 1.0 ST
20	heart	EPFL_LISP_BXD_Heart	GN487	select Chow diet control group exon version	2014	Affymetrix Mouse Gene 2.0 ST
21	hematopoietic cells	GNF_Hematopoietic_Cells	GN7	select latest processing	2003	Affymetrix Mouse U74v2
22	hippocampal precursor cells	CRTD_BXD_Hippocampal_Precursor_Cells	GN706	single dataset per study	2014	Illumina MouseWG-6 custom
23	hippocampus	UMUT Affy Hippocampus	GN206	single dataset per study	2009	Affymetrix Mouse Gene 1.0 ST
24		Hippocampus_Consortium	GN112	select latest PDNN processing	2006	Affymetrix M430 2.0
25		UTHSC_Hippocampus	GN814	select latest processing for saline & no restraint control	2012	Illumina mouse-6 v1.1
26	hypothalamus	INIA_Hypothalamus	GN159	select non sex-specific	2010	Affymetrix Mouse Gene 1.0 ST
27	kidney	Mouse_Kidney	GN117	select latest PDNN processing, "sex balanced" version	2006	Affymetrix Mouse Gene 2.0 ST
28	liver	UNC_Agilent_Liver_DB	GN105	select latest processing, non sex-specific version	2004	Agilent-011978 Mouse Microarray G4121A
29		EPFL_LISP_BXD_Liver	GN432	select Chow diet control group	2013	Affymetrix Mouse Gene 1.0 ST
30		UT_VGX_Hepatocytes	GN701	select exon version	2014	Affymetrix Mouse Gene 1.0 ST
31		GSE16780_UCLA_Hybrid_MDP_Liver	GN373	single dataset per study	2011	Affymetrix M430 2.0
32		SUH_BXD_Liver_CCl4	GN702	select exon version	2011	Affymetrix Mouse Gene 1.0 ST
33		GenEx_BXD_Liver	GN308	single dataset per study	2012	Affymetrix M430 2.0
34	lung	HZI_Lung	GN161	select MAS5 processing	2008	Affymetrix M430 2.0
35		HZI_Infected_Lungs	GN387	single dataset per study	2013	Agilent MouseWG 4x44K
36	midbrain	VU_BXD_Midbrain	GN381	single dataset per study	2012	Agilent SurePrint G3 GE 8x60K
37	muscle	EPFL_LISP_BXD_Muscle	GN397	select Chow diet control group exon version	2012	Affymetrix Mouse Gene 1.0 ST
38	neocortex	BIDMC_UTHSC_Dev_Neocortex	GN374	select latest processing for P3 age group	2011	Illumina MouseWG-6 v2.0
39		HQF_BXD_Neocortex	GN282	select original over transformed version	2008	Illumina MouseWG-6
40	nucleus accumbens	VCU_BXD_Nac_Sal	GN156	single dataset per study	2007	Affymetrix M430 2.0
41	pituitary	INIA_Pituitary	GN335	select exon version	2012	Affymetrix Mouse Gene 1.0 ST
42	prefrontal cortex	VCU_BXD_PFC_Et_vs_Sal	GN135	select saline control group	2006	Affymetrix M430 2.0
43			GN884	select control group	2019	RNA-seq
44	retina	DoD_CDMRP_Retina_2015	GN710	select exon version	2015	Affymetrix Mouse Gene 2.0 ST
45		HEI_Retina	GN267	select version with most strains	2010	Illumina MouseWG-6 v2.0
46	spleen	UTHSC_Spleen	GN429	select exon version for both sexes	2010	Affymetrix Mouse Gene 1.0 ST
47		UTK_Spleen	GN260	single dataset per study	2010	Illumina MouseWG-6 v1, v1.1
48	stem cells	UMCG_Stem_Cells	GN149	select original over transformed version	2009	Illumina MouseWG-6 v1, v1.1
49	striatum	HQF_Striatum	GN163	select exon version	2009	Affymetrix Mouse Exon 1.0 ST
50		HQF_BXD_Striatum	GN152	select Nov07 version	2010	Illumina MouseWG-6 v1, v1.1
51		HBP_Rosen_Striatum	GN68	select latest PDNN processing	2005	Affymetrix M430 2.0
52	T-cells	HZI_Thelp	GN319	single dataset per study	2011	Affymetrix M430 2.0
53		HZI_Treg	GN122	single dataset per study	2011	Affymetrix M430 2.0
54	ventral tegmental area	VCU_BXD_PFC_Et_vs_Sal	GN229	select EtOH test group	2009	Affymetrix M430 2.0

## Sheet: Supp_tbl_6
Supplementary Table 6: Anatomical entities with highest expression of candidate DNA repair genes in the QTL region
For each gene, the top 5 regions are ranked by expression scores available from the Bgee website (bgee.org), accessed 11/07/22. Expression scores range from 0 to 100 and are based on multiple sources of RNA-seq and microarray data.
Gene	Top tissues
Msh3	Animal zygote (91.32)
	Embryonic post-anal tail (90.87)
	Spermatocyte (90.22)
	Secondary oocyte (89.79)
	Undifferentiated genital tubercle (89.17)
Atg10	Interventricular septum (96.79)
	Choroid plexus epithelium (88.24)
	Epithelium of small intestine (87.71)
	Myocardium of ventricle (87.21)
	Intercostal muscle (86.86)
Ssbp2	Metanephric mesenchyme (97.80)
	Facial nucleus (97.76)
	Olfactory epithelium (97.65)
	Urogenital fold (97.51)
	Ciliary body (97.45)
Xrcc4	Spermatocyte (93.20)
	Spermatid (89.67)
	Seminiferous tubule of testis (87.27)
	Animal zygote (85.66)
	Secondary oocyte (84.88)
